# Supplementary material for: Enhanced Photocatalytic Coupling of Benzylamine to N-Benzylidene Benzylamine over the Organic–Inorganic Composites F70-TiO2 Based on Fullerenes Derivatives and TiO2
Source: MDPI journal article supplement (doi:10.3390/molecules28114301), 2023-05-24

## *Supplementary Information*

# **Enhanced Photocatalytic Coupling of Benzylamine to N-Benzylidene Benzylamine over the Organic-Inorganic Composites F70-TiO<sub>2</sub> Based on Fullerenes Derivatives and TiO<sub>2</sub>**

**Yanmeng Guo<sup>1</sup>, Hang Li<sup>1</sup>, Derui Kong, Bo Li<sup>1</sup>, Xin Zhong<sup>1</sup>, Yi-Fan Chen<sup>1,\*</sup>, Yujie Song<sup>1,\*</sup>**

<sup>1</sup>Hainan Provincial Key Laboratory of Fine Chemicals, College of Chemical Engineering and Technology, Hainan University, Haikou, China

**\* Correspondence:**

Yi-Fan Chen

[chenyifan@hainanu.edu.cn](mailto:chenyifan@hainanu.edu.cn)

Yujie Song

[songyuejie@hainanu.edu.cn](mailto:songyuejie@hainanu.edu.cn)

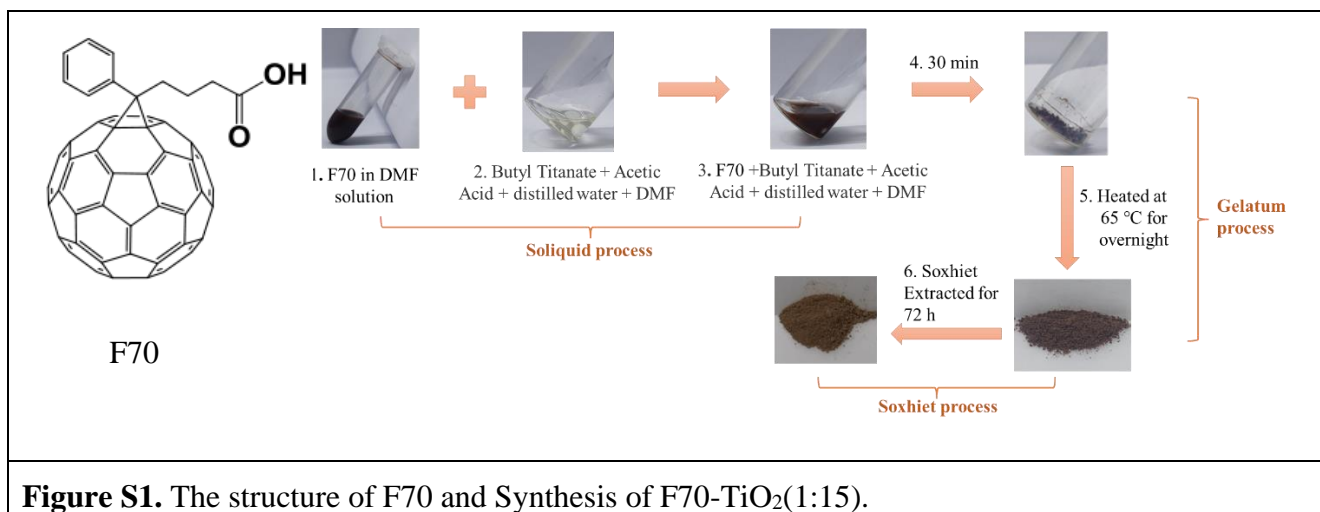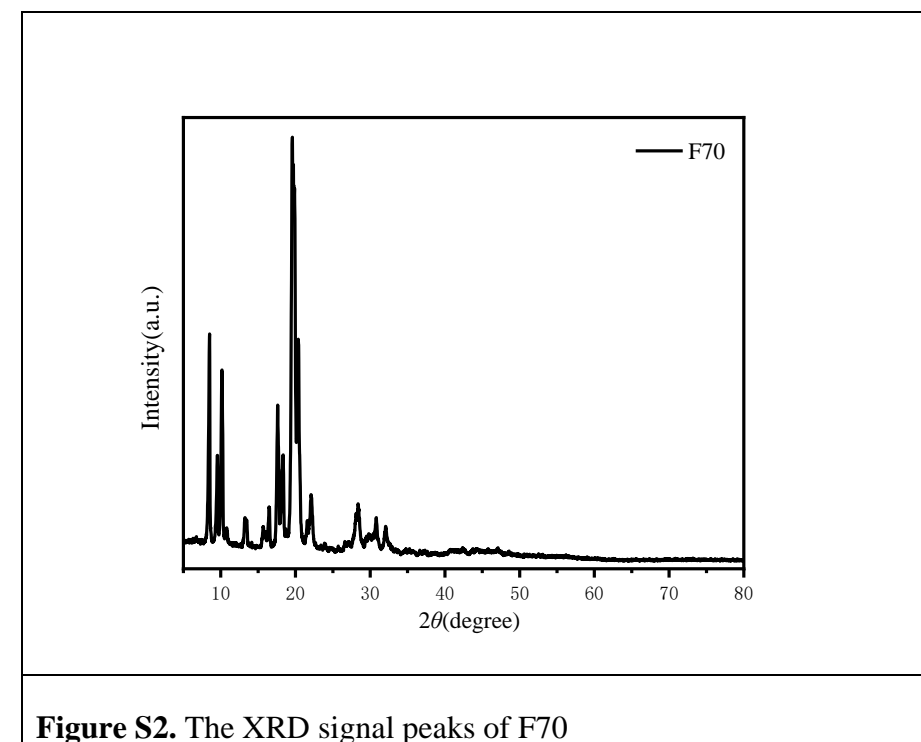

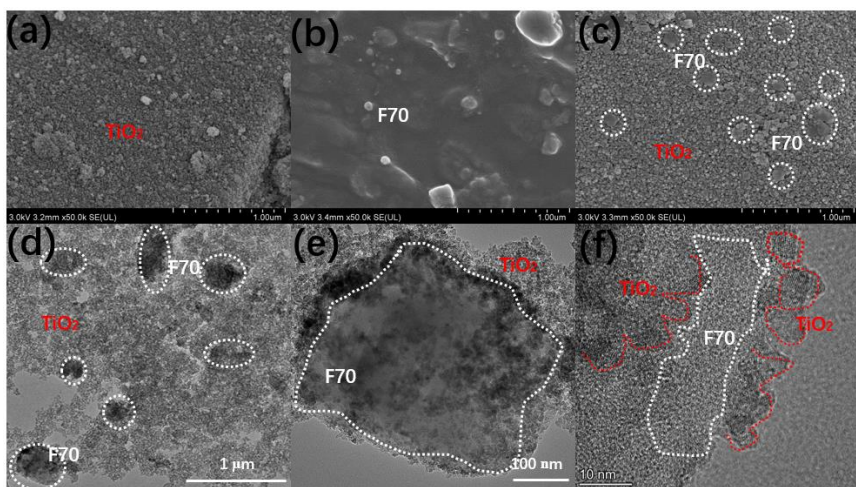

**Figure S3.** (a) SEM of *f*-TiO<sub>2</sub>, (b) SEM of F70, (c) SEM, (d) TEM, and (e) HRTEM of F70-TiO<sub>2</sub>(1:15).

**Table S1.** The BET surface area and the pore size distributions of *f*-TiO<sub>2</sub> and F70-TiO<sub>2</sub>(1:15).

| Sample                      | BET Surface area<br>(m <sup>2</sup> /g) | Pore size<br>(nm) | Pore volume<br>(cm <sup>3</sup> /(g)) |
|-----------------------------|-----------------------------------------|-------------------|---------------------------------------|
| F70-TiO <sub>2</sub> (1:15) | 178.8                                   | 4.452             | 0.2380                                |
| <i>f</i> -TiO <sub>2</sub>  | 198.6                                   | 4.386             | 0.2636                                |

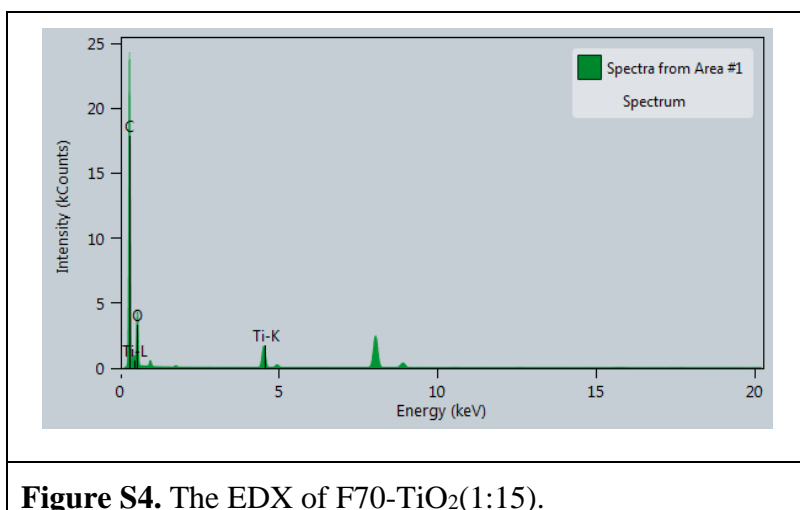

**Figure S4.** The EDX of F70-TiO<sub>2</sub>(1:15).

**Table S2.** The Atom percentages and the binding energy of *f*-TiO<sub>2</sub> and F70-TiO<sub>2</sub>(1:15) by the XPS analysis.

| Sample<br>(eV)              | Ti2p <sub>3/2</sub><br>(eV) | Ti2p <sub>1/2</sub><br>(eV) | C1s                     | O1s            |
|-----------------------------|-----------------------------|-----------------------------|-------------------------|----------------|
| <i>f</i> -TiO <sub>2</sub>  | 458.6                       | 464.3                       | 284.8<br>285.8<br>288.7 | 529.9<br>531.2 |
| Atomic %                    | 24.5                        |                             | 23.7                    | 51.8           |
| F70-TiO <sub>2</sub> (1:15) | 458.7                       | 464.5                       | 284.8<br>285.6<br>288.9 | 530.0<br>531.3 |
| Atomic %                    | 21.7                        |                             | 33.4                    | 44.9           |

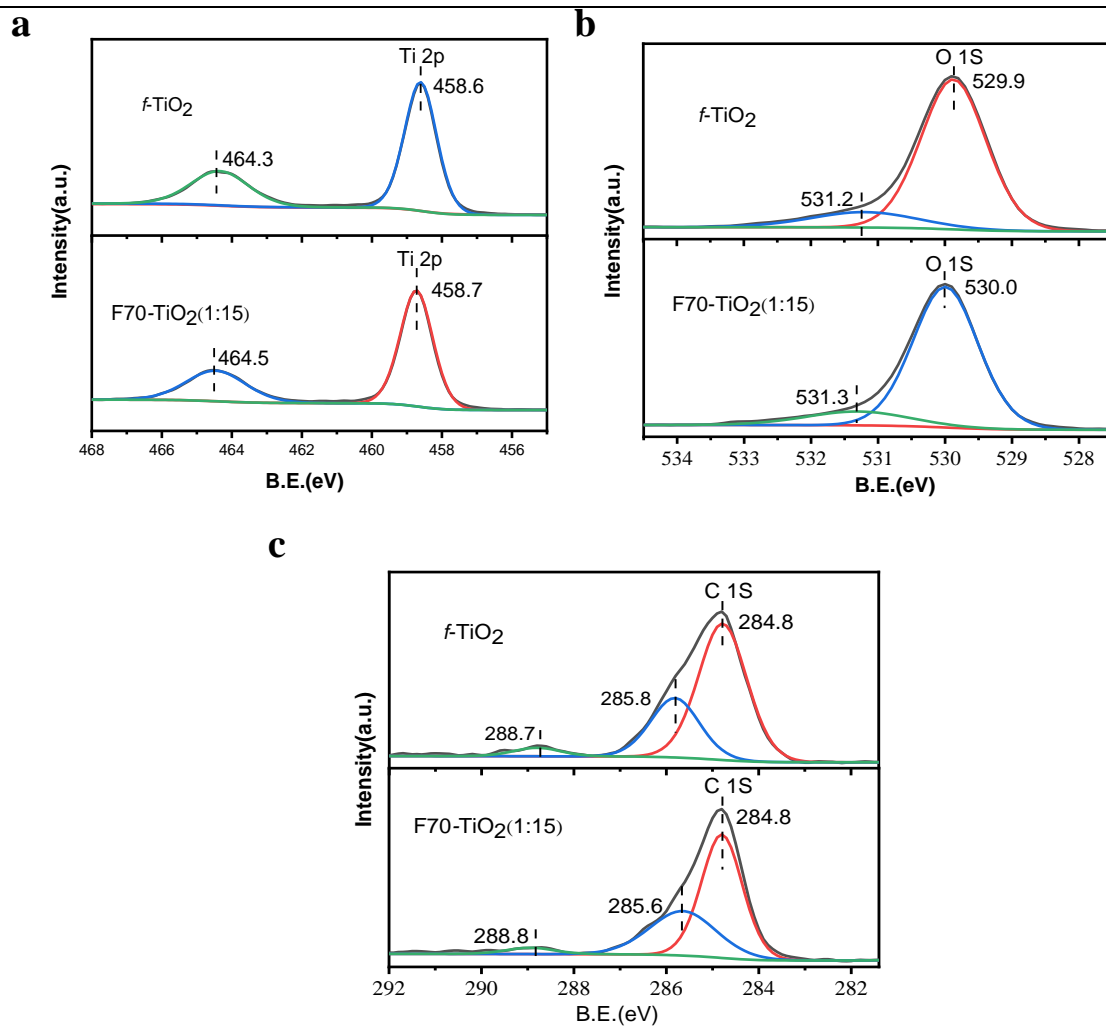

**Figure S5.** XPS spectra for *f*-TiO<sub>2</sub> and F70-TiO<sub>2</sub> (1:15): **(a)** Ti 2p, **(b)** O 1s and **(c)** C 1s.

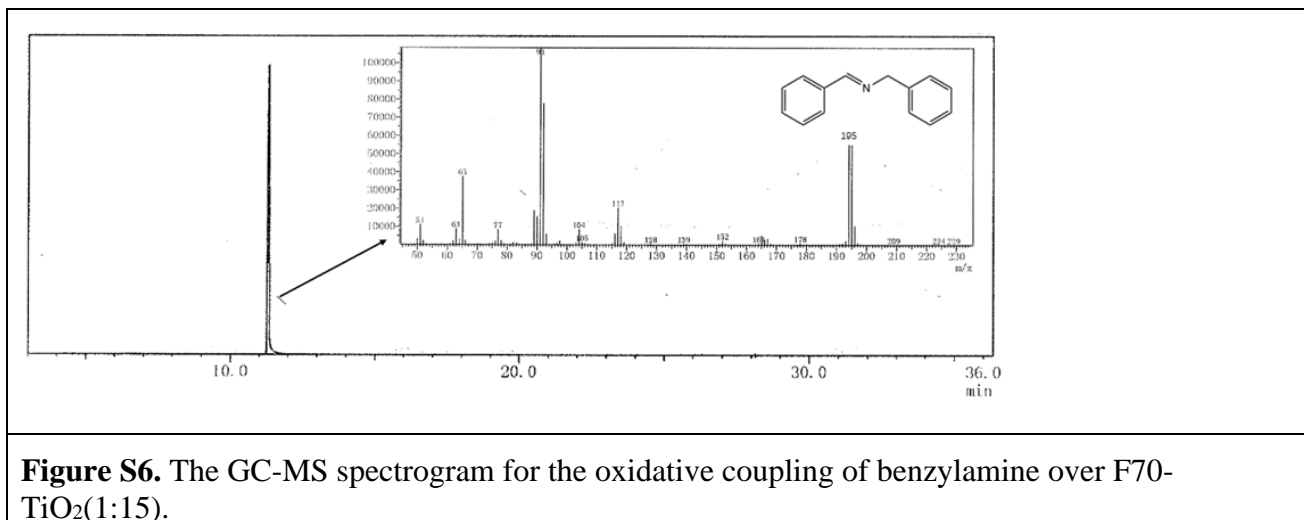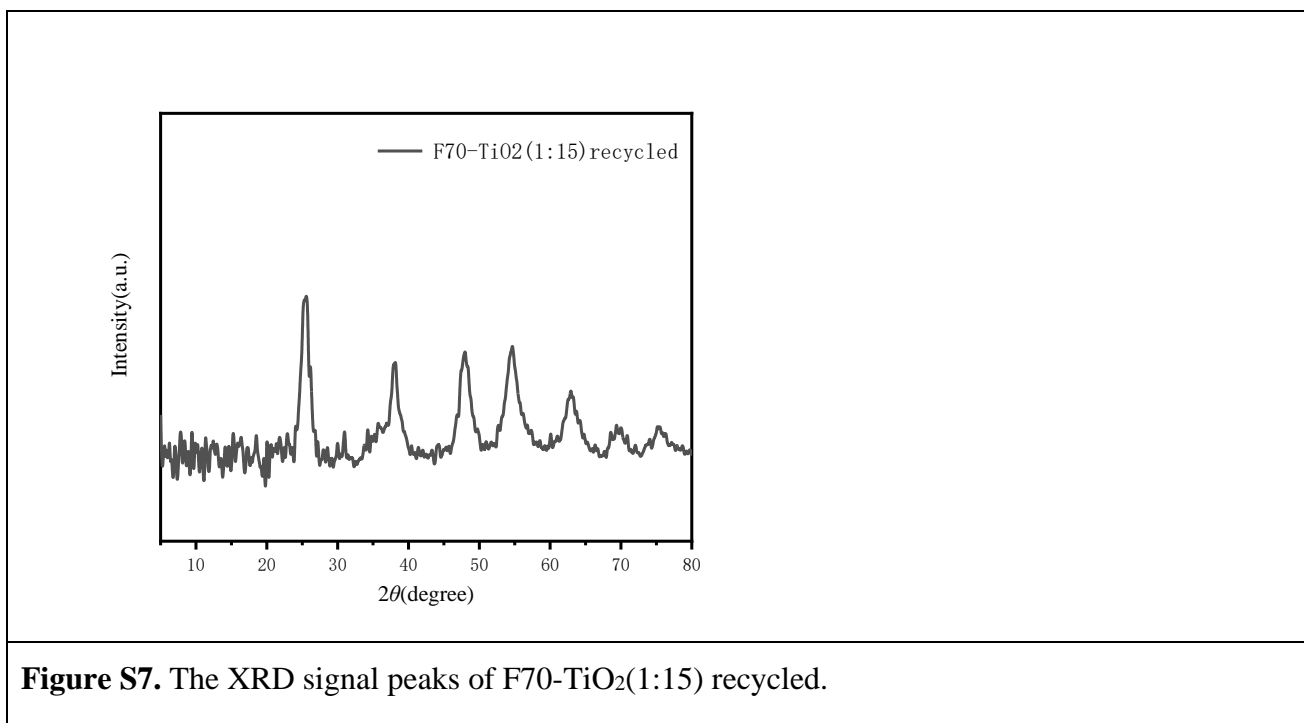

Supplement: s1 [file s1]
